# Supplementary material for: Food-Grade Bacteria Combat Pathogens by Blocking AHL-Mediated Quorum Sensing and Biofilm Formation
Source: MDPI journal article supplement (doi:10.3390/foods12010090), 2022-12-24
Supplement: s1 [file s1]

**Table S1.** Assay performance of the optimized screening method as defined by Z', S/N and S/B values for six independent 96-microtiter plate analyses (n=6). Quercetin and azithromycin were used in each plate as the anti-QS and bactericidal controls, respectively.

| <b>Resorufin</b> | <b>i</b> | <b>ii</b> | <b>iii</b> | <b>iv</b> | <b>v</b> | <b>vi</b> | <b>n=6</b> | <b>Avg.</b> | <b>SD</b> |
|------------------|----------|-----------|------------|-----------|----------|-----------|------------|-------------|-----------|
| <b>Z'</b>        | 0.77     | 0.72      | 0.83       | 0.77      | 0.82     | 0.79      | <b>Z'</b>  | 0.78        | 0.04      |
| <b>S/N</b>       | 15.42    | 13.07     | 19.96      | 15.42     | 19.42    | 19.73     | <b>S/N</b> | 17.17       | 2.91      |
| <b>S/B</b>       | 8.42     | 6.27      | 8.79       | 8.42      | 8.03     | 6.07      | <b>S/B</b> | 7.67        | 1.19      |
| <b>Violacein</b> | <b>i</b> | <b>ii</b> | <b>iii</b> | <b>iv</b> | <b>v</b> | <b>vi</b> | <b>n=6</b> | <b>Avg.</b> | <b>SD</b> |
| <b>Z'</b>        | 0.70     | 0.70      | 0.68       | 0.61      | 0.66     | 0.70      | <b>Z'</b>  | 0.68        | 0.04      |
| <b>S/N</b>       | 13.95    | 10.37     | 9.90       | 8.00      | 8.95     | 13.95     | <b>S/N</b> | 10.85       | 2.54      |
| <b>S/B</b>       | 12.06    | 19.20     | 11.59      | 15.16     | 17.67    | 12.06     | <b>S/B</b> | 14.63       | 3.25      |
