# Supplementary figures and images for: Food-Grade Bacteria Combat Pathogens by Blocking AHL-Mediated Quorum Sensing and Biofilm Formation
Source: MDPI journal article supplement (doi:10.3390/foods12010090), 2022-12-24

Figure S2

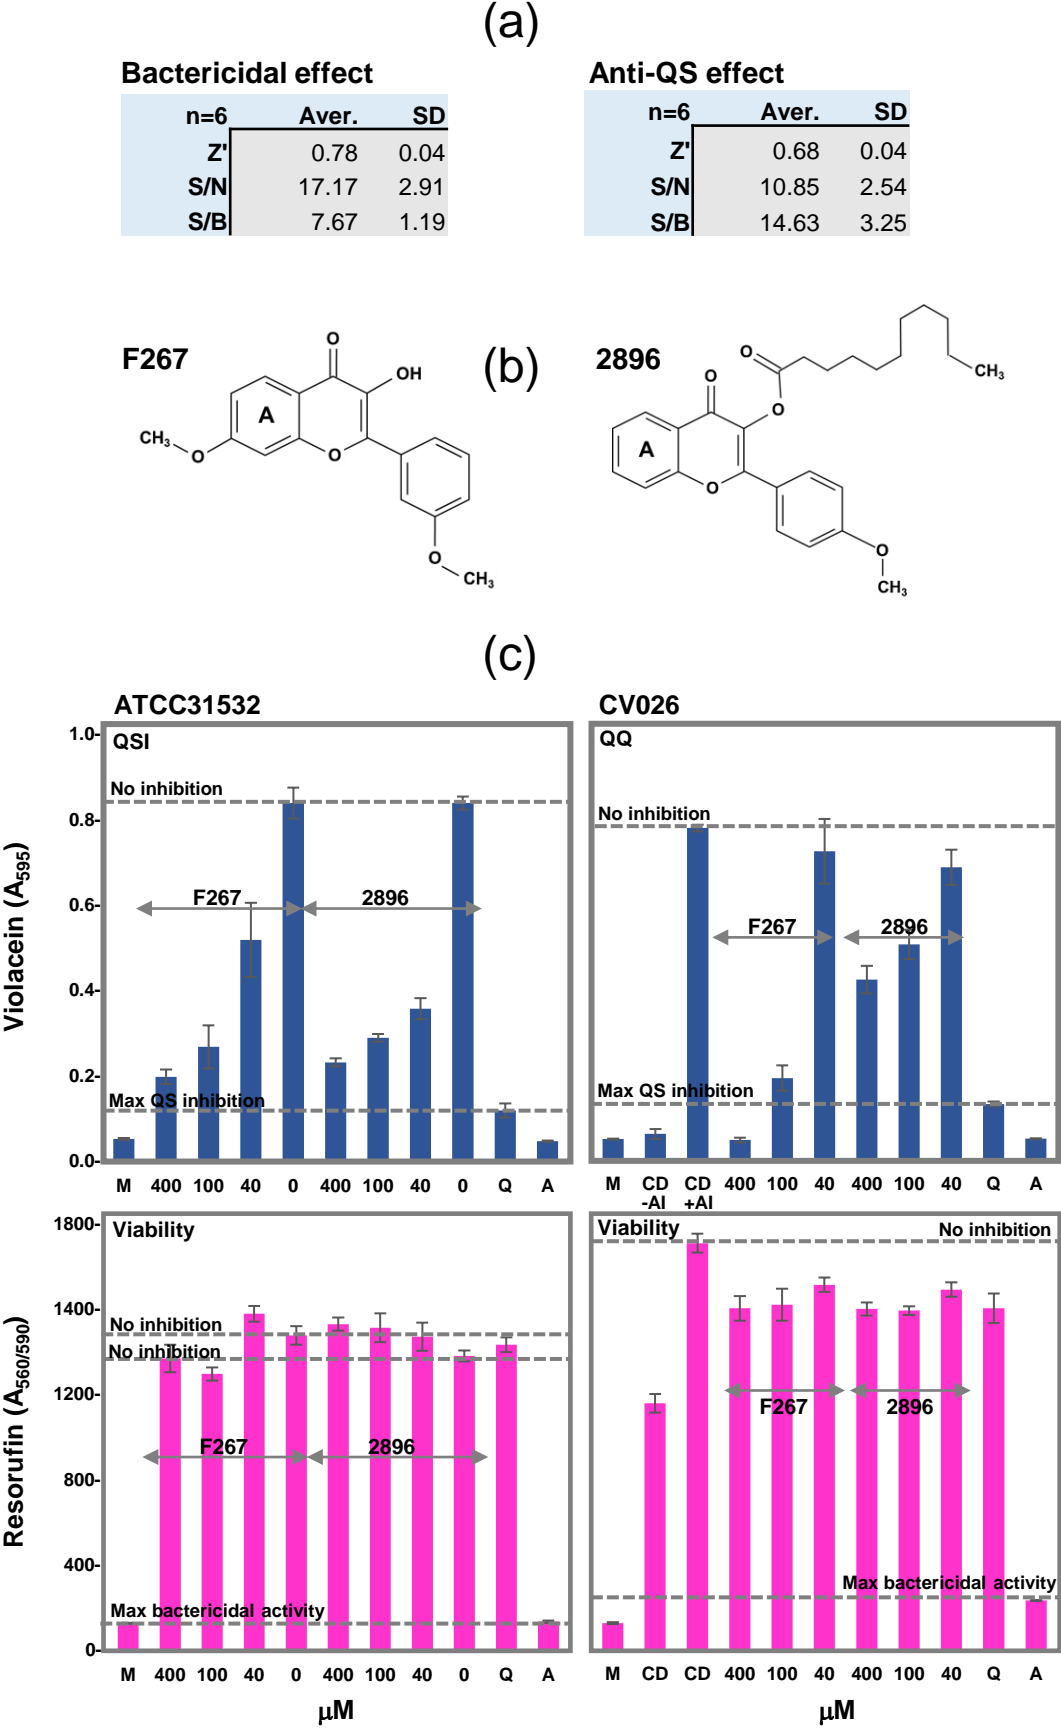

Supplement: s1 [file s1]

Figure S1

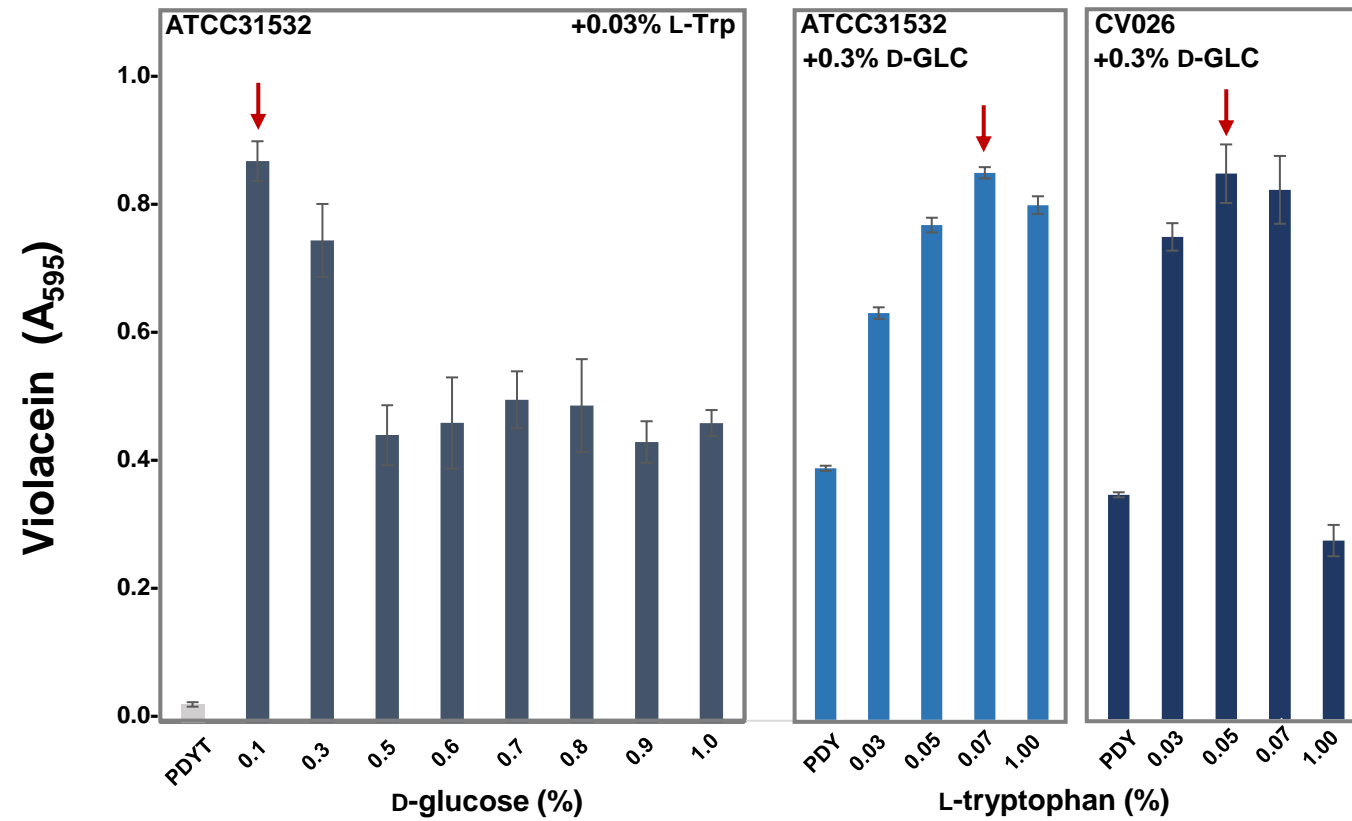

Supplement: s1 [file s1]
